# Supplementary material
Source: MDPI journal article supplement (https://www.mdpi.com/2073-4441/16/2/268)
Supplement: s1 [file s1]

# **Supplementary Materials: Beyond Microplastics: Circular water for industrial processes by implementation of a two-stage removal process for microplastics and chemical oxygen demand**

**Michael Toni Sturm <sup>1</sup>, Erika Myers <sup>1</sup>, Dennis Schober <sup>1,2</sup>, Anika Korzin <sup>1</sup>, and Katrin Schuhen<sup>1,\*</sup>**

<sup>1</sup> Wasser 3.0 gGmbH, Neufeldstr. 17a-19a, 76187 Karlsruhe, Germany; [info@wasserdreinull.de](mailto:info@wasserdreinull.de)

<sup>2</sup> abcr GmbH, Im Schlehert 10, 76187 Karlsruhe, Germany; [info@abcr.com](mailto:info@abcr.com)

\* Correspondence: [schuhen@wasserdreinull.de](mailto:schuhen@wasserdreinull.de), +49 721 15 65 95 93

Table S1: Raw data of all measured parameters for all test phases and batches.

| Batch | Sampling location | pH [-] | COD [mg/L] | TSS [mg/L] | Particle count [n/L] | Turbidity / [NTU] |
|-------|-------------------|--------|------------|------------|----------------------|-------------------|
| 1     | Untreated         | 7.2    | 10 782     | 722.21     | 77 403 439           | 612               |
|       | After belt filter | 6.4    | 8 990      | 23.25      | 605 361              | 18                |
|       | After fixed bed   | 8      | 605        | 6.34       | n.a                  | 9                 |
| 2     | Untreated         | 7.1    | 10 929     | 823.53     | 69 538 918           | 607               |
|       | After belt filter | 6.5    | 9 250      | 8.23       | 843 366              | 14                |
|       | After fixed bed   | 7.6    | 3 693      | 7.58       | n.a                  | 11                |
| 3     | Untreated         | 6.6    | 10 489     | 818.03     | 70 366 763           | 620               |
|       | After belt filter | 7      | 8 944      | 17.71      | 574 317              | 17                |
|       | After fixed bed   | 7.6    | 3 638      | 8.9        | n.a                  | 12                |
| 4     | Untreated         | n.a    | n.a        | n.a        | n.a                  | n.a               |
|       | After belt filter | n.a    | n.a        | n.a        | n.a                  | n.a               |
|       | After fixed bed   | n.a    | n.a        | n.a        | n.a                  | n.a               |

  

|   |                   |     |       |          |            |     |
|---|-------------------|-----|-------|----------|------------|-----|
| 1 | Untreated         | 6.8 | 4 080 | 1 297.56 | 22 765 717 | 657 |
|   | After belt filter | 6.7 | 2 650 | 192.22   | 507 055    | 31  |
|   | After fixed bed   | 7   | 54    | 1.44     | n.a        | 5   |
| 2 | Untreated         | 6.9 | 4 450 | 1 092.06 | 9 809 955  | 694 |
|   | After belt filter | 6.7 | 2 560 | 6.77     | 205 409    | 34  |
|   | After fixed bed   | 7   | 40    | 3.45     | n.a        | 10  |
| 3 | Untreated         | 6.8 | 4 030 | 947.36   | 12 127 919 | 675 |
|   | After belt filter | 7.4 | 2 437 | 26.8     | 333 725    | 33  |
|   | After fixed bed   | 7.3 | 65    | 11.6     | n.a        | 22  |
| 4 | Untreated         | 7.2 | 3 600 | 1 176.94 | 11 796 781 | 483 |
|   | After belt filter | 7.4 | 1 453 | 132.05   | 299 576    | 30  |
|   | After fixed bed   | 7.1 | 71    | 0.63     | n.a        | 30  |

|   |                   |     |      |         |             |     |
|---|-------------------|-----|------|---------|-------------|-----|
| 1 | Untreated         | 6.7 | 4470 | 2381.15 | 82 370 505  | 933 |
|   | After belt filter | 6.8 | 1189 | 78.41   | 442 379     | 41  |
|   | After fixed bed   | 7.2 | 5    | 3.24    | n.a         | 3   |
| 2 | Untreated         | 6.8 | 4290 | 1970.74 | 125 418 406 | 936 |
|   | After belt filter | 6.7 | 1204 | 28.69   | 1 241 766   | 46  |
|   | After fixed bed   | 6.9 | 6    | 2.93    | n.a         | 10  |
| 3 | Untreated         | 7   | 4380 | 2142.84 | 93 960 324  | 995 |
|   | After belt filter | 6.9 | 1483 | 157.94  | 782 572     | 147 |
|   | After fixed bed   | 6.9 | 40   | 3.33    | n.a         | 19  |
| 4 | Untreated         | 7   | 3570 | 1750.75 | 101 410 923 | 953 |
|   | After belt filter | 6.9 | 1323 | 140.02  | 712 722     | 121 |
|   | After fixed bed   | 6.7 | 46   | 4.07    | n.a         | 26  |

|   |                   |     |      |         |            |     |
|---|-------------------|-----|------|---------|------------|-----|
| 1 | Untreated         | 6.6 | 2333 | 1048    | 58 983 904 | 624 |
|   | After belt filter | 5.1 | 1073 | 78.71   | 227 140    | 25  |
|   | After fixed bed   | 6.8 | 5    | 10.3    | n.a        | 5   |
| 2 | Untreated         | n.a | n.a  | n.a     | n.a        | n.a |
|   | After belt filter | 5.7 | 927  | 17.97   | 464 628    | 20  |
|   | After fixed bed   | 6.5 | 58.4 | 5.05    | n.a        | 7   |
| 3 | Untreated         | 6.4 | 2547 | 1176.09 | 54 844 683 | 617 |
|   | After belt filter | 6.2 | 854  | 35.43   | 304 750    | 30  |
|   | After fixed bed   | 6.4 | 104  | 7.52    | n.a        | 9   |
| 4 | Untreated         | 6.7 | 2338 | 996.61  | 68 711 074 | 643 |
|   | After belt filter | 6.7 | 818  | 8.48    | 241 110    | 35  |
|   | After fixed bed   | 6.4 | 107  | 5.82    | n.a        | 15  |

|   |                   |      |      |        |            |     |
|---|-------------------|------|------|--------|------------|-----|
| 1 | Untreated         | 6.50 | 1766 | 685.90 | 33 113 782 | 342 |
|   | After belt filter | 5.26 | 896  | 11.63  | 130 077    | 21  |
|   | After fixed bed   | 5.67 | 4    | 4.82   | n.a        | 1   |
| 2 | Untreated         | 6.17 | 1241 | 740.56 | 30 581 519 | 702 |
|   | After belt filter | 5.77 | 1060 | 16.29  | 58 402     | 32  |
|   | After fixed bed   | 6.05 | 6    | 11.55  | n.a        | 1   |
| 3 | Untreated         | 6.31 | 1391 | 802.34 | 28 931 555 | 442 |
|   | After belt filter | 6.00 | 1065 | 5.29   | 54 327     | 24  |
|   | After fixed bed   | 6.03 | 19   | 17.17  | n.a        | 1   |
| 4 | Untreated         | 6.31 | 1375 | 759.56 | 40 233 246 | 608 |
|   | After belt filter | 6.18 | 1071 | 17.20  | 17 228     | 21  |
|   | After fixed bed   | 6.09 | 54   | 4.43   | n.a        | 1   |

|   |                   |     |       |       |            |     |
|---|-------------------|-----|-------|-------|------------|-----|
| 1 | Untreated         | 6.9 | 2 589 | 559.2 | 17 695 171 | 554 |
|   | After belt filter | 6.8 | 1 471 | 59.6  | 1 232 971  | 165 |
|   | After fixed bed   | 6   | 5     | 17.5  | n.a        | 4   |
| 2 | Untreated         | 7.2 | 2 627 | 565.5 | 12 624 625 | 557 |
|   | After belt filter | 7.1 | 1 573 | 28.7  | 1 165 191  | 91  |
|   | After fixed bed   | 6.2 | 323   | 8.3   | n.a        | 12  |
| 3 | Untreated         | 7.2 | 2 391 | 565.6 | 17 384 730 | 558 |
|   | After belt filter | 7.3 | 1 637 | 29.3  | 1 176 574  | 83  |
|   | After fixed bed   | 6.4 | 394   | 0.0   | n.a        | 16  |
| 4 | Untreated         | 7.2 | 2 220 | 411.2 | 20 592 626 | 495 |
|   | After belt filter | 7.3 | 1 626 | 13.7  | 1 095 859  | 75  |
|   | After fixed bed   | 6.7 | 403   | 4.0   | n.a        | 10  |

|   |                   |     |       |        |            |     |
|---|-------------------|-----|-------|--------|------------|-----|
| 1 | Untreated         | 7   | 2 226 | 1121.1 | 47 187 123 | 653 |
|   | After belt filter | 6.4 | 931   | 101.8  | 2 036 450  | 129 |
|   | After fixed bed   | 6.3 | 14.1  | 44.3   | n.a        | 12  |
| 2 | Untreated         | 6.5 | 2 188 | 962.6  | 33 527 693 | 602 |
|   | After belt filter | 6.5 | 582   | 85.9   | 354 938    | 14  |
|   | After fixed bed   | 6   | 104   | 85.2   | n.a        | 16  |
| 3 | Untreated         | 6.5 | 2 210 | 1032.8 | 44 703 590 | 671 |
|   | After belt filter | 6.5 | 564   | 50     | 392 709    | 20  |
|   | After fixed bed   | 5.9 | 177   | 49.2   | n.a        | 10  |
| 4 | Untreated         | 6.2 | 2 183 | 1070.2 | 62 502 242 | 660 |
|   | After belt filter | 6.5 | 567   | 145.1  | 436 170    | 28  |
|   | After fixed bed   | 5.7 | 172   | 50.3   | n.a        | 7   |

|   |                   |     |       |        |            |     |
|---|-------------------|-----|-------|--------|------------|-----|
| 1 | Untreated         | 6.8 | 2 525 | 1005.9 | 49 256 734 | 616 |
|   | After belt filter | 6.6 | 763   | 97.2   | 2 337 367  | 105 |
|   | After fixed bed   | 6.3 | 7.24  | 75.6   | n.a        | 31  |
| 2 | Untreated         | 6.1 | 2 600 | 1403.6 | 47 187 123 | 673 |
|   | After belt filter | 6   | 771   | 57.3   | 1 122 764  | 38  |
|   | After fixed bed   | 5.7 | 9.3   | 27.6   | n.a        | 7   |
| 3 | Untreated         | 6.3 | 2 611 | 1067.5 | 55 879 488 | 650 |
|   | After belt filter | 5.9 | 838   | 66.6   | 880 878    | 12  |
|   | After fixed bed   | 5.6 | 13.1  | 10.3   | n.a        | 8   |
| 4 | Untreated         | 6   | 2 450 | 969.8  | 48 428 890 | 676 |
|   | After belt filter | 6   | 882   | 59.1   | 430 738    | 18  |
|   | After fixed bed   | 5.6 | 83.9  | 14.1   | n.a        | 9   |
